# Supplementary material for: Efficacy and Safety of Leadless Pacemakers for Atrioventricular Synchronous Pacing: A Systematic Review and Meta-Analysis
Source: MDPI journal article supplement (doi:10.3390/jcm12072512), 2023-03-27

## *Supplementary Material*

### **Efficacy and safety of leadless pacemakers for atrioventricular synchronous pacing: a systematic review and meta-analysis**

**Sijin Wu, Yuanhao Jin, Wenzhao Lu, Zhongli Chen, Yan Dai, and Keping Chen\***

**\* Correspondence:** Corresponding Author: chenkeping@263.net

#### **1 Supplementary Method S1. Data Sources and Search strategies**

Example of a search strategy run in Pubmed

#1

TS=((leadless[Title/Abstract]) OR (wireless[Title/Abstract])) OR  
(Micra[Title/Abstract])

#2

TS=((synchron\*[Title/Abstract]) OR (atrioventricular[Title/Abstract])) OR  
(AV[Title/Abstract])

#3

TS=((pacemaker[Title/Abstract]) OR (pacing[Title/Abstract])) OR (artificial  
pacemaker[MeSH Terms])

#4

TS= #1 AND #2 AND #3

#5

TS= ("1948/01/01"[Date - Publication] : "2022/09/12"[Date - Publication])

#6

TS= #4 AND #5

**2 Supplementary Table S1.** The quality assessment of included studies using the National Institutes of Health (NIH) quality assessment tool for before–after (pre-post) study with no control group. (References [6–10,14–16] in reference list of the main text)

| Study                 | Year | 1 | 2  | 3  | 4  | 5  | 6 | 7  | 8  | 9  | 10 | 11 | 12 | Quality |
|-----------------------|------|---|----|----|----|----|---|----|----|----|----|----|----|---------|
| MARVEL [6]            | 2018 | Y | Y  | Y  | NR | Y  | Y | Y  | CD | Y  | Y  | NR | NA | Good    |
| Steinwender et al [7] | 2020 | Y | Y  | Y  | CD | CD | Y | Y  | NR | Y  | Y  | NR | NA | Good    |
| Arps et al [14]       | 2021 | Y | Y  | Y  | NR | NR | Y | Y  | NR | NR | Y  | NR | NA | Fair    |
| Briongos et al [8]    | 2022 | Y | Y  | Y  | NR | NR | Y | Y  | Y  | Y  | Y  | Y  | NA | Good    |
| Chinitz et al [15]    | 2022 | Y | Y  | Y  | CD | Y  | Y | Y  | CD | Y  | Y  | Y  | NA | Good    |
| Kowlgi et al [9]      | 2022 | Y | CD | Y  | NR | CD | Y | Y  | NR | Y  | Y  | Y  | NA | Fair    |
| Mechulan et al [16]   | 2022 | Y | Y  | CD | Y  | CD | Y | NR | Y  | Y  | NR | Y  | NA | Fair    |
| Neugebauer et al [10] | 2022 | Y | Y  | Y  | Y  | CD | Y | Y  | CD | Y  | Y  | Y  | NA | Good    |

Abbreviations: CD, cannot determine; NA, not applicable; NR, not reported

**3 Supplementary Figure S1.** The sensitivity analysis of studies included for atrioventricular synchrony. (References [6–10,14–16] in reference list of the main text)

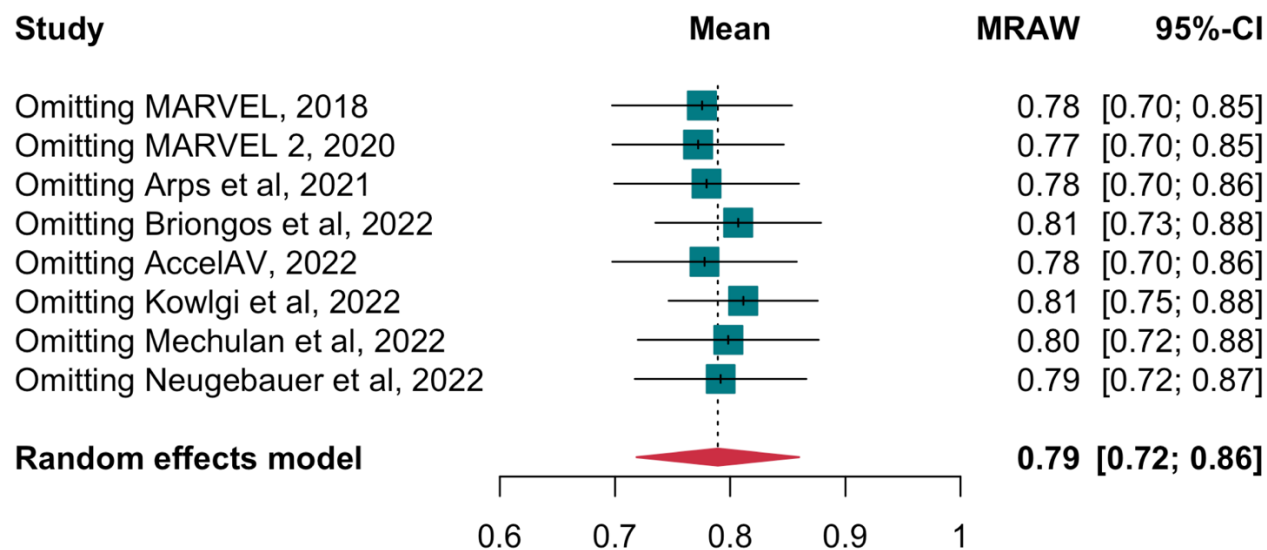

Supplement: s1 [file s1]
